# Supplementary material for: Shared genetic factors and causal association between chronic hepatitis C infection and diffuse large B cell lymphoma
Source: Infect Agent Cancer. 2024 Apr 23;19:15. doi: 10.1186/s13027-024-00577-4 (PMC11040981; doi:10.1186/s13027-024-00577-4)
Supplement: Supplementary file 2 — Supplementary Material 2 [file 13027_2024_577_MOESM2_ESM.xlsx]

## Sheet: Sheet1
Supplementary Data 2. Details of Chronic Hepatitis C infection SNPs with B cell lymphoma (with genome-wide significant SNPs)
SNP	Chronic Hepatitis C infection(Exposure)							B cell lymphoma(Outcome)			F-statistic
	Effect allele	Other allele	P value	Beta	N	Standard Error	Subtype	OR	Standard Error	P value
							CLL
rs2853968	A	G	1.78e-10	0.1124	352013	0.0176		1.05905	0.0564598	0.309542	40.7854
rs412657	T	G	6.3e-09	0.1032	352013	0.0178		0.93203	0.0576522	0.222105	33.6137
rs8113007	A	T	5.42e-22	0.2709	352013	0.0281		0.934893	0.0649176	0.299713	92.9401
rs9275267	A	G	2.32e-12	-0.1226	352013	0.0175		1.04551	0.0563727	0.429833	49.0798
rs9501400	G	A	8.05e-11	0.1111	352013	0.0171		0.919875	0.0895497	0.35101	42.2118
							DLBCL
rs2853968	A	G	1.78e-10	0.1124	352013	0.0176		0.99785	0.0446576	0.961566	40.7854
rs412657	T	G	6.3e-09	0.1032	352013	0.0178		1.02889	0.0459774	0.535603	33.6137
rs8113007	A	T	5.42e-22	0.2709	352013	0.0281		1.09527	0.051892	0.0795024	92.9401
rs9275267	A	G	2.32e-12	-0.1226	352013	0.0175		0.977551	0.044853	0.612711	49.0798
rs9501400	G	A	8.05e-11	0.1111	352013	0.0171		1.11981	0.0704763	0.108361	42.2118
							MCL
rs2853968	A	G	1.78e-10	0.1124	352013	0.0176		1.12099	0.0996666	0.251832	40.7854
rs412657	T	G	6.3e-09	0.1032	352013	0.0178		0.964372	0.10266	0.723799	33.6137
rs8113007	A	T	5.42e-22	0.2709	352013	0.0281		0.970546	0.115278	0.795375	92.9401
rs9275267	A	G	2.32e-12	-0.1226	352013	0.0175		1.16097	0.0998845	0.135096	49.0798
rs9501400	G	A	8.05e-11	0.1111	352013	0.0171		1.29264	0.155368	0.0985099	42.2118
							MZL
rs2853968	A	G	1.78e-10	0.1124	352013	0.0176		1.13046	0.101792	0.228342	40.7854
rs412657	T	G	6.3e-09	0.1032	352013	0.0178		0.809071	0.104258	0.0421366	33.6137
rs8113007	A	T	5.42e-22	0.2709	352013	0.0281		1.15383	0.118691	0.227999	92.9401
rs9275267	A	G	2.32e-12	-0.1226	352013	0.0175		1.27701	0.101317	0.0158034	49.0798
rs9501400	G	A	8.05e-11	0.1111	352013	0.0171		1.00735	0.158711	0.963218	42.2118
							WM
rs2853968	A	G	1.78e-10	0.1124	352013	0.0176		1.27823	0.15367	0.110177	40.7854
rs412657	T	G	6.3e-09	0.1032	352013	0.0178		0.885669	0.156519	0.437923	33.6137
rs8113007	A	T	5.42e-22	0.2709	352013	0.0281		1.30524	0.178235	0.135018	92.9401
rs9275267	A	G	2.32e-12	-0.1226	352013	0.0175		1.0309	0.153867	0.843195	49.0798
rs9501400	G	A	8.05e-11	0.1111	352013	0.0171		1.13397	0.241262	0.602275	42.2118
