# Supplementary material for: Shared genetic factors and causal association between chronic hepatitis C infection and diffuse large B cell lymphoma
Source: Infect Agent Cancer. 2024 Apr 23;19:15. doi: 10.1186/s13027-024-00577-4 (PMC11040981; doi:10.1186/s13027-024-00577-4)
Supplement: Supplementary file 3 — Supplementary Material 3 [file 13027_2024_577_MOESM3_ESM.xlsx]

## Sheet: Sheet1
Supplementary Data 3.Association of chronic hepatitis C infection with B cell lymphoma Using Mendelian Randomization (With SNPs reaching p < 5 x 10-8)
Exposure	No.of SNPs	Outcome	Methods				Cochran's Q statistic				Egger intercept		MR-PRESSO
				OR	95%CI	P-value	Q	Q_df	Q-value	I2	intercept	P-value	P-value
CHC	5	DLBCL	MR Egger	1.47426	0.73-2.99	0.360326	1.98438	3	0.575656	0.808115	-0.0156329	0.796698
			Inverse variance weighted	1.34331	1.01-1.78	0.0396743	2.06356	4	0.724069	0.818983			0.809
			Weighted median	1.35603	0.98-1.88	0.0693168
CHC	5	CLL	MR Egger	0.785027	0.31-1.99	0.646055	3.33396	3	0.342944	0.100169	0.000561477	0.994389
			Inverse variance weighted	0.787646	0.55-1.12	0.18489	3.33402	4	0.50356	0.199751			0.652
			Weighted median	0.758306	0.50-1.14	0.187024
CHC	5	MZL	MR Egger	4.28149	0.28-65.94	0.373838	8.62264	3	0.0347526	0.652079	-0.258095	0.314908
			Inverse variance weighted	0.916343	0.29-2.88	0.88116	12.7894	4	0.0123518	0.687242			0.124
			Weighted median	1.49969	0.67-3.38	0.328038
CHC	5	MCL	MR Egger	0.709708	0.07-6.88	0.786609	6.27913	3	0.0987921	0.522227	0.0521224	0.789694
			Inverse variance weighted	0.967443	0.44-2.14	0.934927	6.45693	4	0.167525	0.38051			0.305
			Weighted median	0.871502	0.41-1.85	0.720925
CHC	5	WM	MR Egger	4.17719	0.35-49.49	0.33942	3.12042	3	0.373429	0.038591	-0.117495	0.587893
			Inverse variance weighted	2.07428	0.79-5.44	0.138294	3.5011	4	0.477711	0.142497			0.572
			Weighted median	2.30568	0.74-7.14	0.147532
