# Supplementary material for: Shared genetic factors and causal association between chronic hepatitis C infection and diffuse large B cell lymphoma
Source: Infect Agent Cancer. 2024 Apr 23;19:15. doi: 10.1186/s13027-024-00577-4 (PMC11040981; doi:10.1186/s13027-024-00577-4)
Supplement: Supplementary file 4 — Supplementary Material 4 [file 13027_2024_577_MOESM4_ESM.xlsx]

## Sheet: Sheet1
Supplementary Data 4. Variant Effect Predictor of Key SNPs
SNPs	Location	Allele	Consequence	IMPACT	SYMBOL	Gene	Feature_type	Feature	BIOTYPE
rs482759	6:32227240-32227240	G	upstream_gene_variant	MODIFIER	NOTCH4	ENSG00000204301	Transcript	ENST00000375023.3	protein_coding
rs482759	6:32227240-32227240	T	upstream_gene_variant	MODIFIER	NOTCH4	ENSG00000204301	Transcript	ENST00000375023.3	protein_coding
rs482759	6:32227240-32227240	G	upstream_gene_variant	MODIFIER	NOTCH4	ENSG00000204301	Transcript	ENST00000473562.1	retained_intron
rs482759	6:32227240-32227240	T	upstream_gene_variant	MODIFIER	NOTCH4	ENSG00000204301	Transcript	ENST00000473562.1	retained_intron
rs17208853	6:32408583-32408583	C	upstream_gene_variant	MODIFIER	BTNL2	ENSG00000204290	Transcript	ENST00000374993.5	protein_coding_CDS_not_defined
rs17208853	6:32408583-32408583	C	upstream_gene_variant	MODIFIER	BTNL2	ENSG00000204290	Transcript	ENST00000446536.3	protein_coding
rs17208853	6:32408583-32408583	C	upstream_gene_variant	MODIFIER	BTNL2	ENSG00000204290	Transcript	ENST00000454136.8	protein_coding
rs17208853	6:32408583-32408583	C	upstream_gene_variant	MODIFIER	BTNL2	ENSG00000204290	Transcript	ENST00000465865.6	nonsense_mediated_decay
rs17208853	6:32408583-32408583	C	upstream_gene_variant	MODIFIER	BTNL2	ENSG00000204290	Transcript	ENST00000544175.3	nonsense_mediated_decay
rs17208853	6:32408583-32408583	C	downstream_gene_variant	MODIFIER	TSBP1-AS1	ENSG00000225914	Transcript	ENST00000642577.1	lncRNA
rs17208853	6:32408583-32408583	C	downstream_gene_variant	MODIFIER	TSBP1-AS1	ENSG00000225914	Transcript	ENST00000645134.1	lncRNA
rs17208853	6:32408583-32408583	C	downstream_gene_variant	MODIFIER	TSBP1-AS1	ENSG00000225914	Transcript	ENST00000645167.1	lncRNA
